# Supplementary material for: Optical Properties of Mn-Doped CuGa(In)S-ZnS Nanocrystals (NCs): Effects of Host NC and Mn Concentration
Source: MDPI journal article supplement (doi:10.3390/nano12060994), 2022-03-17
Supplement: s1 [file s1]

Supplementary Material

# Optical Properties of Mn-Doped CuGa(In)S-ZnS Nanocrystals (NCs): Effects of Host NC and Mn Concentration

Bryan Lee <sup>1,2</sup>, Tristan Hegseth <sup>1</sup>, and Xiaoshan Zhu <sup>1,2,\*</sup>

<sup>1</sup> Department of Electrical and Biomedical Engineering, University of Nevada Reno, Reno, NV 89557, USA; bryanlee@nevada.unr.edu (B.L.); tristanhegseth@nevada.unr.edu (T.H.)

<sup>2</sup> Biomedical Engineering Program, University of Nevada Reno, Reno, NV 89557, USA

\* Correspondence: xzhu@unr.edu

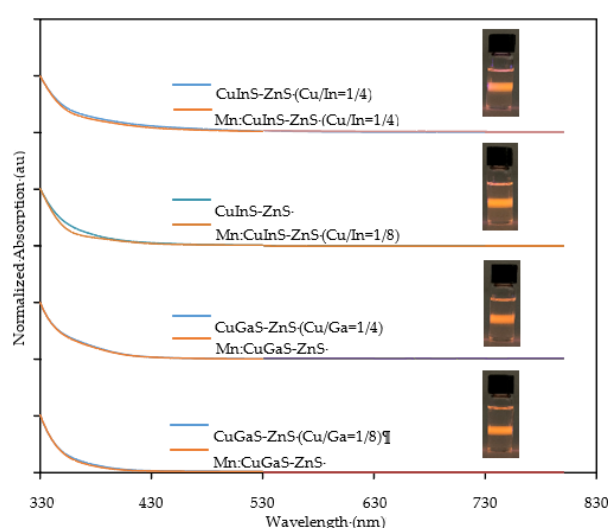

**Figure S1.** Absorption spectra of each type of host NCs and its corresponding Mn doped NCs (0.0125 mmol Mn doped into each type of host NCs). The inset images show the fluorescence of all types of Mn doped NCs under the exposure of a 405 nm laser beam, indicating all Mn doped NCs are excitable at 405 nm.

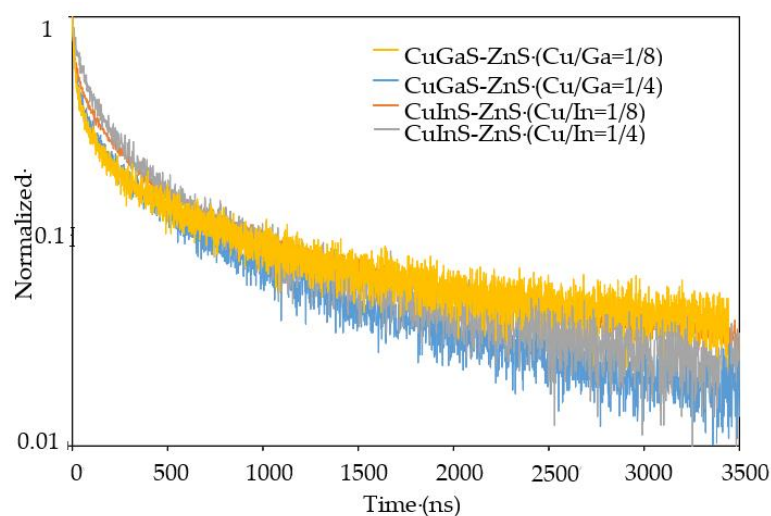

**Figure S2.** Fluorescence decays of four types of host NCs (measured at their fluorescence peak wavelengths).

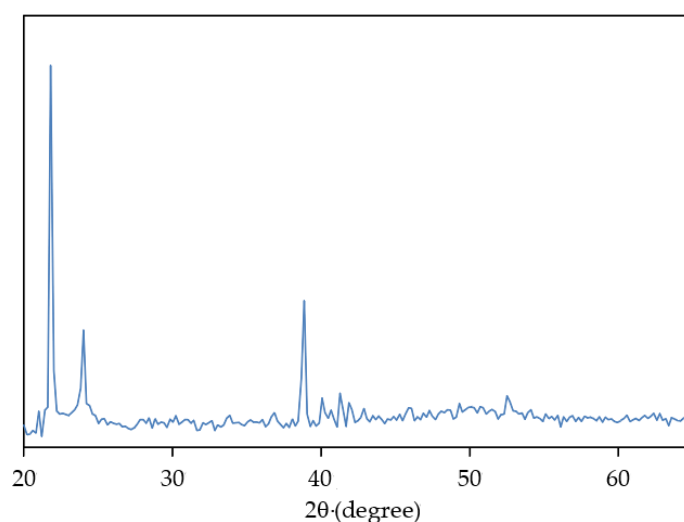

**Figure S3.** XRD pattern of CuGaS NCs (Cu/Ga = 1/8).

**Table S1.** ICP analysis data for host NCs and the corresponding Mn doped NCs.

|              | Nominal molar ratios |       |       |       | Actual milli-mole of element per 1 g NCs |       |       |       |        | Actual molar ratios |       |       |       |
|--------------|----------------------|-------|-------|-------|------------------------------------------|-------|-------|-------|--------|---------------------|-------|-------|-------|
|              | Cu/Ga                | Cu/In | Mn/Ga | Mn/In | Cu                                       | Ga    | In    | Mn    | Zn     | Cu/Ga               | Cu/In | Mn/Ga | Mn/In |
| CuGaS-ZnS    | 1/8                  | NA    | 0     | NA    | 0.075                                    | 0.608 | 0.000 | 0.000 | 11.698 | 0.123               | NA    | 0.000 | NA    |
|              | 1/4                  | NA    | 0     | NA    | 0.134                                    | 0.691 | 0.000 | 0.000 | 10.198 | 0.195               | NA    | 0.000 | NA    |
| CuInS-ZnS    | NA                   | 1/8   | NA    | 0     | 0.091                                    | 0.000 | 0.887 | 0.000 | 8.602  | NA                  | 0.102 | NA    | 0.000 |
|              | NA                   | 1/4   | NA    | 0     | 0.154                                    | 0.000 | 0.875 | 0.000 | 8.021  | NA                  | 0.176 | NA    | 0.000 |
| Mn:CuGaS-ZnS | 1/8                  | NA    | 1/8   | NA    | 0.075                                    | 0.558 | 0.000 | 0.070 | 9.612  | 0.134               | NA    | 0.125 | NA    |
|              | 1/4                  | NA    | 1/8   | NA    | 0.160                                    | 0.661 | 0.000 | 0.098 | 11.380 | 0.243               | NA    | 0.148 | NA    |
| Mn:CuInS-ZnS | NA                   | 1/8   | NA    | 1/8   | 0.076                                    | 0.000 | 0.720 | 0.094 | 10.864 | NA                  | 0.106 | NA    | 0.130 |
|              | NA                   | 1/4   | NA    | 1/8   | 0.138                                    | 0.001 | 0.749 | 0.079 | 10.407 | NA                  | 0.184 | NA    | 0.106 |

**Table S2.** ICP analysis data for Mn doped NCs with different Mn concentrations in synthesis.

|              | Mn Conc. (mmol) | Nominal Mn/(Ga + Cu) | Actual milli-mole of element per 1 g NCs |       |       |       |        | Actual Mn/(Ga + Cu) |
|--------------|-----------------|----------------------|------------------------------------------|-------|-------|-------|--------|---------------------|
|              |                 |                      | Cu                                       | Ga    | In    | Mn    | Zn     |                     |
| Mn:CuGaS-ZnS | 0.003125        | 0.028                | 0.068                                    | 0.635 | 0.000 | 0.020 | 11.011 | 0.028               |
|              | 0.00625         | 0.056                | 0.079                                    | 0.647 | 0.000 | 0.050 | 11.233 | 0.068               |
|              | 0.0125          | 0.111                | 0.075                                    | 0.558 | 0.000 | 0.070 | 9.612  | 0.111               |
|              | 0.025           | 0.222                | 0.061                                    | 0.585 | 0.000 | 0.144 | 11.080 | 0.223               |
|              | 0.0375          | 0.333                | 0.063                                    | 0.556 | 0.000 | 0.228 | 10.530 | 0.369               |

**Table S3.** Effects of Mn concentration on optical properties of Mn:CuGaS-ZnS (Cu/Ga = 1/4) NCs.

| Mn Conc. in Synthesis (mmol) | Wavelength (nm) | QY    | $\tau_1$ (ms) | A <sub>1</sub> | $\tau_2$ (ms) | A <sub>2</sub> | Avg $\tau$ (ms) |
|------------------------------|-----------------|-------|---------------|----------------|---------------|----------------|-----------------|
| 0.003125                     | ~ 595           | 4.8%  | 0.28          | 69.8%          | 3.07          | 30.2%          | 2.58            |
| 0.00625                      | ~ 595           | 12.4% | 0.28          | 73.7%          | 2.50          | 26.3%          | 1.97            |
| 0.0125                       | ~ 595           | 11.7% | 0.22          | 75.2%          | 1.63          | 24.8%          | 1.22            |

**Table S4.** Effects of Mn concentration on optical properties of Mn:CuInS-ZnS (Cu/In = 1/8) NCs.

| Mn Conc. in Synthesis (mmol) | Wavelength (nm) | QY | $\tau_1$ (ms) | A <sub>1</sub> | $\tau_2$ (ms) | A <sub>2</sub> | Avg $\tau$ (ms) |
|------------------------------|-----------------|----|---------------|----------------|---------------|----------------|-----------------|
|------------------------------|-----------------|----|---------------|----------------|---------------|----------------|-----------------|

|          |       |       |      |       |      |       |      |
|----------|-------|-------|------|-------|------|-------|------|
| 0.003125 | ~ 595 | 5.3%  | 0.31 | 65.6% | 3.03 | 34.4% | 2.59 |
| 0.00625  | ~ 595 | 14.7% | 0.32 | 69.5% | 2.4  | 30.5% | 1.93 |
| 0.0125   | ~ 595 | 13.7% | 0.19 | 76.6% | 1.47 | 23.4% | 1.09 |

**Table S5.** Effect of Mn concentration on optical properties of Mn:CuInS-ZnS (Cu/In = 1/4) NCs.

| Mn Conc. in<br>Synthesis (mmol) | Wavelength<br>(nm) | QY   | $\tau_1$ (ms) | A <sub>1</sub> | $\tau_2$ (ms) | A <sub>2</sub> | Avg $\tau$ (ms) |
|---------------------------------|--------------------|------|---------------|----------------|---------------|----------------|-----------------|
| 0.003125                        | ~ 595              | 0.8% | 0.21          | 79.1%          | 2.21          | 20.9%          | 1.68            |
| 0.00625                         | ~ 595              | 1.9% | 0.21          | 78.7%          | 1.89          | 21.3%          | 1.39            |
| 0.0125                          | ~ 595              | 2.7% | 0.11          | 68.2%          | 1.02          | 31.8%          | 0.86            |
